# Supplementary material
Source: PubMed Central journal article supplement (PMC3020753)

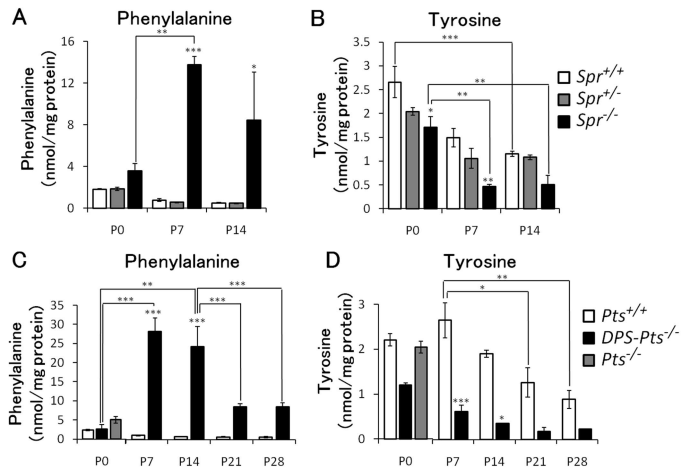

Supplement: supp_M110.159426_jbc.M110.159426-1.pdf [file supp_M110.159426_jbc.M110.159426-1.pdf]
